# Supplementary material for: Perioperative Metabolites Are Associated With Adverse Neonatal Congenital Heart Disease Surgical Outcomes
Source: PubMed Central journal article supplement — J Am Heart Assoc. 2022 Aug 10;11(16):e024996. doi: 10.1161/JAHA.121.024996 (PMC9496308; doi:10.1161/jaha.121.024996), 2022-08-10
Supplement: JAH3-11-e024996-s001.pdf [file JAH3-11-e024996-s001.pdf]

## **SUPPLEMENTAL MATERIAL**

| <b>Table S1. Targeted panel of metabolites</b> |                                                                           |
|------------------------------------------------|---------------------------------------------------------------------------|
| MDC ID                                         | Compound name                                                             |
| 0125_Ribulose 5-phosphate                      | Ribulose 5-phosphate sodium salt                                          |
| 0108_ADP / 0273_3,5-ADP                        | Adenosine diphosphate                                                     |
| 0243_IDP                                       | Inosine 5-diphosphate                                                     |
| 0132_IMP                                       | 2-Inosine-5-monophosphate / Inosinic acid                                 |
| 0154_O-Phosphoethanolamine                     | O-Phosphoethanolamine                                                     |
| 0179_Glucosamine 6-phosphate                   | D-GLUCOSAMINE 6-PHOSPHATE                                                 |
| 0147_Gluconic acid                             | GLUCONATE                                                                 |
| 0246_Nicotinamide hypoxanthine dinucleotide    | NICOTINAMIDE HYPOXANTHINE DINUCLEOTIDE                                    |
| 0192_Ciliatine                                 | (2-AMINOETHYL)PHOSPHONATE                                                 |
| 0159_Tartaric acid                             | Tartaric acid                                                             |
| 0367_Sn-Glycero-3-phosphocholine               | SN-GLYCERO-3-PHOSPHOCHOLINE                                               |
| 0191_Glucuronolactone                          | D-GLUCURONOLACTONE                                                        |
| 0200_Galactitol                                | GALACTITOL                                                                |
| 0020_Citicoline                                | Cytidine 5-Diphosphocholine / Citicoline / Choline 5-cytidine diphosphate |
| 0312_Glucosaminic acid                         | GLUCOSAMINATE                                                             |
| 0341_Methionine sulfoximine                    | METHIONINE SULFOXIMINE                                                    |
| 0048_4-Hydroxyproline                          | 4-Hydroxy-L-Proline                                                       |
| 0149_Dihydroorotic acid                        | Dihydroorotic acid                                                        |
| 0028_Cystine                                   | Cystine                                                                   |
| 0013_Aspartic acid                             | Aspartic acid                                                             |
| 0223_N-Methylaspartic acid                     | N-METHYL-D-ASPARTIC ACID                                                  |
| 0017_2,3-cyclic CMP                            | Cytidine 2,3-Cyclic Monophosphate / 2,3-Cyclic CMP                        |
| 0168_Thiourea                                  | Thiourea                                                                  |
| 0092_Orotic acid                               | Orotic acid                                                               |
| 0012_Aspargine                                 | L-Asparagine                                                              |
| 0068_Serine                                    | Serine                                                                    |
| 0038_Glutamine                                 | Glutamine                                                                 |
| 0160_Nicotinamide mononucleotide               | Nicotinamide mononucleotide                                               |
| 0234_Nalpha-Acetylasparagine                   | N-ALPHA-ACETYL-L-ASPARAGINE                                               |
| 0026_Cystathionine                             | Cystathionine                                                             |
| 0098_Homoserine                                | Homoserine                                                                |
| 0057_Methionine Sulfoxide                      | Methionine sulfoxide                                                      |
| 0070_Threonine / 0359_Allothreonine            | Threonine/Allothreonine                                                   |

|                                |                                                |
|--------------------------------|------------------------------------------------|
| 0322_S-Carboxymethylcysteine   | S-CARBOXYMETHYL-L-CYSTEINE                     |
| 0183_Betaine                   | BETAINE                                        |
| 0226_N-methylglutamic Acid     | N-METHYL-L-GLUTAMATE                           |
| 0378_N-Acetylserine            | N-ACETYL-DL-SERINE                             |
| 0039_Glutamic acid             | Glutamic acid                                  |
| 0073_TMP                       | Thymidine 5'-monophosphate / 5-Thymidylic acid |
| 0021_Citrulline                | Citrulline                                     |
| 0158_dCMP                      | 2-Deoxycytidine 5-monophosphate                |
| 0064_Proline                   | Proline                                        |
| 0336_3-Ureidopropionic acid    | 3-UREIDOPROPIONATE                             |
| 0008_Alanine                   | Alanine                                        |
| 0146_Sarcosine                 | Sarcosine                                      |
| 0302_C6_sugar_amine            | C6 sugar amine                                 |
| 0076_Uracil                    | Uracil                                         |
| 0370_Trigonelline              | TRIGONELLINE                                   |
| 0242_N-Acetylaspartic acid     | N-AMIDINO-L-ASPARTATE                          |
| 0369_2,3-Diaminopropionic acid | DL-2,3-Diaminopropionic acid monohydrochloride |
| 0091_NAD                       | Nicotinamide adenine dinucleotide              |
| 0358_5-Hydroxylysine           | DL-5-HYDROXYLYSINE                             |
| 0321_Orthanilic acid           | ANILINE-2-SULFONIC ACID                        |
| 0143_Beta-Alanine              | Beta-Alanine                                   |
| 0201_5-Oxoproline              | 5-OXO-D-PROLINE                                |
| 0164_dAMP                      | Deoxyadenosine monophosphate                   |
| 0023_Creatine                  | Creatine                                       |
| 0364_Citramalic acid           | CITRAMALATE                                    |
| 0097_Xanthine                  | Xanthine                                       |
| 0061_Ornithine                 | Ornithine                                      |
| 0044_Histidine                 | Histidine                                      |
| 0371_3,4-Dihydroxyphenylglycol | 3,4-DIHYDROXYPHENYL GLYCOL                     |
| 0085_Fumaric acid              | Fumaric acid                                   |
| 0055_Lysine                    | Lysine                                         |
| 0049_Hypoxanthine              | Hypoxanthine / 6-Hydroxypurine                 |
| 0325_N-Acetylglutamic acid     | N-ACETYL-DL-GLUTAMIC ACID                      |
| 0059_Nicotinic acid            | Nicotinic acid                                 |
| 0077_Uridine                   | Uridine                                        |
| 0373_2-Hydroxybutyric acid     | 2-HYDROXYBUTYRIC ACID                          |
| 0036_Gamma-aminobutyric acid   | Gamma-aminobutyric acid / 4-aminobutanoic acid |
| 0140_Pipecolic acid            | Pipecolic acid                                 |

|                                   |                                                     |
|-----------------------------------|-----------------------------------------------------|
| 0018_3,5-cyclic GMP               | Guanosine 3,5-Cyclic Monophosphate / 3,5-Cyclic GMP |
| 0253_2,3-cyclic AMP               | ADENOSINE 2,3-CYCLIC MONOPHOSPHATE                  |
| 0030_Cytosine                     | Cytosine                                            |
| 0006_Adenylsuccinic acid          | Adenylosuccinic acid / Adenylsuccinic acid          |
| 0204_Methylguanidine              | METHYLGUANIDINE                                     |
| 0221_3-Hydroxymethylglutaric acid | 3-HYDROXY-3-METHYLGLUTARATE                         |
| 0346_4-Imidazoleacetic acid       | 4-IMIDAZOLEACETIC ACID                              |
| 0047_Homocystine                  | Homocystine                                         |
| 0404_Maleic acid                  | MALEIC ACID                                         |
| 0438_2-Hydroxypyridine            | 2-HYDROXYPYRIDINE                                   |
| 0305_Thiamine monophosphate       | THIAMINE MONOPHOSPHATE                              |
| 0010_Arginine                     | Arginine                                            |
| 0170_3-Aminoisobutanoic acid      | 3-Aminoisobutanoic acid                             |
| 0060_Ophthalmic acid              | Ophthalmic acid                                     |
| 0211_4-Acetamidobutanoic acid     | 4-ACETAMIDOBUTANOATE                                |
| 0014_3,5-cyclic AMP               | Adenosine 3,5-Cyclic Monophosphate / 3,5-Cyclic AMP |
| 0058_Nicotinamide                 | Nicotinamide                                        |
| 0461_Pterin                       | PTERIN                                              |
| 0051_Inosine                      | Inosine                                             |
| 0133_Purine                       | Purine                                              |
| 0056_Methionine                   | Methionine                                          |
| 0267_N-Alpha-acetyllysine         | NALPHA-ACETYL-L-LYSINE                              |
| 0024_Creatinine                   | Creatinine                                          |
| 0015_Carnitine                    | Carnitine                                           |
| 0189_O-Succinylhomoserine         | O-SUCCINY-L-L-HOMOSERINE                            |
| 0327_6-Hydroxynicotinic acid      | 6-HYDROXYNICOTINATE                                 |
| 0491_Itaconic acid                | ITACONATE                                           |
| 0086_Glutathione oxidized         | Glutathione oxidized / Glutathione disulfide        |
| 0512_Vanillylmandelic acid        | 3-METHOXY-4-HYDROXYMANDELATE                        |
| 0043_Guanosine                    | Guanosine                                           |
| 0259_5-Methylcytosine             | 5-METHYLCYTOSINE HYDROCHLORIDE                      |
| 0283_2-Deoxyguanosine             | 2-DEOXYGUANOSINE                                    |
| 0029_Cytidine                     | Cytidine                                            |
| 0071_Thymidine                    | Thymidine                                           |
| 0323_N-Acetylputrescine           | N-ACETYLPUTRESCINE                                  |
| 0337_5-Aminopentanoic acid        | 5-AMINOPENTANOATE                                   |
| 0514_4-Quinolinecarboxylic acid   | 4-QUINOLINECARBOXYLIC ACID                          |

|                                 |                                      |
|---------------------------------|--------------------------------------|
| 0062_Pantothenic acid           | Pantothenic acid                     |
| 0202_4-Pyridoxic acid           | 4-PYRIDOXATE                         |
| 0293_Indoxyl sulfate            | INDOXYL SULFATE                      |
| 0462_Ethylmalonic acid          | ETHYLMALONIC ACID                    |
| 0193_Selenomethionine           | SELENOMETHIONINE                     |
| 0278_Pyridoxamine               | PYRIDOXAMINE                         |
| 0351_Theobromine                | THEOBROMINE                          |
| 0426_Desmeninol                 | 2-HYDROXY-4-(METHYLTHIO)BUTYRIC ACID |
| 0178_2-Deoxycytidine            | DEOXYCYTIDINE                        |
| 0266_Octopamine                 | OCTOPAMINE                           |
| 0004_Adenine                    | Adenine                              |
| 0005_Adenosine                  | Adenosine                            |
| 0205_1-Methyladenosine          | 1-METHYLADENOSINE                    |
| 0442_Protocatechuic acid        | 3,4-DIHYDROXYBENZOATE                |
| 0194_Paraxanthine               | PARAXANTHINE                         |
| 0532_Hydroxyphenyllactic acid   | 3-(4-HYDROXYPHENYL)LACTATE           |
| 0075_Tyrosine                   | Tyrosine                             |
| 0209_Urocanic acid              | UROCANATE                            |
| 0381_3-Hydroxykynurenine        | 3-HYDROXYKYNURENINE                  |
| 0286_N-Acetylmethionine         | N-ACETYL-DL-METHIONINE               |
| 0469_4-Aminobenzoic acid        | 4-AMINOBENZOATE                      |
| 0531_3-Methyladenine            | 3-METHYLADENINE                      |
| 0516_Pyridoxal                  | PYRIDOXAL                            |
| 0034_Epinephrine                | Epinephrine / Adrenaline             |
| 0536_Pyrrole-2-carboxylic acid  | PYRROLE-2-CARBOXYLATE                |
| 0460_2-Quinolinecarboxylic acid | 2-QUINOLINECARBOXYLIC ACID           |
| 0343_3-Methoxytyrosine          | 3-METHOXY-L-TYROSINE                 |
| 0412_Pimelic acid               | 6-CARBOXYHEXANOATE                   |
| 0533_Biotin                     | BIOTIN                               |
| 0425_Thiopurine S-methylether   | THIOPURINE S-METHYLETHER             |
| 0195_Caffeine                   | CAFFEINE                             |
| 0421_Caffeic acid               | CAFFEATE                             |
| 0537_5-Hydroxyindoleacetic acid | 5-HYDROXYINDOLEACETATE               |
| 0050_Isoleucine                 | Isoleucine                           |
| 0459_Hippuric acid              | HIPPURATE                            |
| 0489_N-Acetylserotonin          | N-ACETYLSEROTONIN                    |
| 0481_Gentisic acid              | 2,5-DIHYDROXYBENZOATE                |

|                                           |                                                       |
|-------------------------------------------|-------------------------------------------------------|
| 0525_3-Hydroxyphenylacetic acid           | 3-HYDROXYPHENYLACETATE                                |
| 0349_5-Hydroxytryptophan                  | 5-HYDROXY-L-TRYPTOPHAN                                |
| 0229_Thyrotropin releasing hormone        | THYROTROPIN RELEASING HORMONE                         |
| 0163_Pyridoxine                           | Pyridoxine                                            |
| 0487_Dethiobiotin                         | DETHIOBIOTIN                                          |
| 0007_ADMA / 0067_SDMA<br>Dimethylarginine | Dimethylarginine                                      |
| 0416_Mandelic acid                        | MANDELIC ACID                                         |
| 0053_Leucine                              | Leucine                                               |
| 0318_5-Deoxyadenosine                     | 5-DEOXYADENOSINE                                      |
| 0295_Normetanephrine                      | DL-NORMETANEPHRINE                                    |
| 0503_N-Acetylleucine                      | N-ACETYL-L-LEUCINE                                    |
| 0338_Norleucine                           | NORLEUCINE                                            |
| 0493_Suberic acid                         | SUBERIC ACID                                          |
| 0430_2-Pyrocatechuic acid                 | 2,3-DIHYDROXYBENZOATE                                 |
| 0410_Kynurenic acid                       | 4-HYDROXY-2-QUINOLINECARBOXYLIC ACID                  |
| 0033_Dopamine                             | Hydroxytyramine / Dopamine                            |
| 0388_Xanthurenic acid                     | XANTHURENIC ACID                                      |
| 0473_2-Aminophenol                        | 2-AMINOPHENOL                                         |
| 0450_3-Indoleacetamide                    | INDOLE-3-ACETAMIDE                                    |
| 0274_3-Nitrotyrosine                      | 3-NITRO-L-TYROSINE                                    |
| 0506_Salicylamide                         | SALICYLAMIDE                                          |
| 0413_N-Acetylphenylalanine                | N-ACETYL-L-PHENYLALANINE                              |
| 0063_Phenylalanine                        | Phenylalanine                                         |
| 0466_Melilotic acid                       | 3-(2-HYDROXYPHENYL)PROPANOATE                         |
| 0479_Anthranilic acid                     | ANTHRANILATE                                          |
| 0433_Ferulic acid                         | FERULATE                                              |
| 0422_Lumichrome                           | LUMICHROME                                            |
| 0505_Salsolinol                           | 1-METHYL-6,7-DIHYDROXY-1,2,3,4-TETRAHYDROISOQUINOLINE |
| 0173_N-acetyltryptophan                   | N-acetyl-D-tryptophan                                 |
| 0052_Kynurenine                           | Kynurenine                                            |
| 0482_Azelaic acid                         | AZELAIC ACID                                          |
| 0420_Indoleacetic acid                    | N-ACETYL-L-ASPARTIC ACID                              |
| 0395_Tyramine                             | TYRAMINE                                              |
| 0403_Melatonin                            | MELATONIN                                             |
| 0356_Guanidinosuccinic acid               | INDOLE-3-ACETATE                                      |
| 0432_Indole-3-ethanol                     | INDOLE-3-ETHANOL                                      |
| 0436_10-Hydroxydecanoic acid C10:0(OH)    | 10-HYDROXYDECANOATE                                   |

|                                     |                        |
|-------------------------------------|------------------------|
| 0396_Cortisol                       | CORTISOL               |
| 0467_3-Methoxytyramine              | 3-METHOXYTYRAMINE      |
| 0069_Serotonin                      | Serotonin              |
| 0454_Lipoamide                      | LIPOAMIDE              |
| 0415_3,5-Diiodotyrosine             | 3,5-DIIODO-L-TYROSINE  |
| 0074_Tryptophan                     | Tryptophan             |
| 0434_Glycocholic acid               | GLYCOCHOLATE           |
| 0423_Tryptophanamide                | L-TRYPTOPHANAMIDE      |
| 0307_S-Hexylglutathione             | S-HEXYL-GLUTATHIONE    |
| 0449_Hydrocortisone 21-acetate      | CORTISOL 21-ACETATE    |
| 0463_3,5-Diiodothyronine            | 3,5-DIIODO-L-THYRONINE |
| MDC= Molecular<br>Determinants Core |                        |

**Table S2. Top 20 metabolites (or features) contributing to the first 6 dimensions of PC analysis**

| <b>PC1</b>               | <b>PC2</b>              | <b>PC3</b>              |
|--------------------------|-------------------------|-------------------------|
| t1 Phenylalanine         | t2 Serine               | t3 Leucine              |
| t1 Proline               | r32 4-Hydroxyproline    | t3 Serine               |
| cum Histidine            | t2 Phenylalanine        | t3 Phenylalanine        |
| t1 Histidine             | r32 Serine              | t3 Lysine               |
| t1 Isoleucine            | r32 Histidine           | t3 Histidine            |
| t1 Serine                | r32 Alanine             | t3 Isoleucine           |
| t1 Lysine                | r32 Glutamine           | t3 Proline              |
| t1 Leucine               | r32 Tyrosine            | t3 Tyrosine             |
| t1 Methionine Sulfoxide  | r32 N-Acetylserine      | t3 Methionine Sulfoxide |
| cum Methionine           | t2 Histidine            | t3 Glutamine            |
| t1 Arginine              | t2 Lysine               | r31 Proline             |
| cum Lysine               | r32 Proline             | t3 Alanine              |
| t1 Alanine               | r32 Cystine             | t3 Methionine           |
| t1 Methionine            | t2 Tyrosine             | r31 Alanine             |
| cum Methionine Sulfoxide | r32_ Tryptophan         | t3 4-Hydroxyproline     |
| t1 5-Oxoproline          | r32 Phenylalanine       | r31 Phenylalanine       |
| t1 Tyrosine              | t2 Glutamine            | t3 5-Oxoproline         |
| t1 Tryptophan            | t2 Alanine              | r31 Isoleucine          |
| cum Alanine              | r32 Sn-Glycero-3-phosph | r31 Methionine          |



cum Phenylalanine

r32 Ornithine

r31 Glutamine

**PC4**

**PC5**

**PC6**

r21 Lysine

r32 Paraxanthine

Cum 3-Methoxytyrosine

r31 Lysine

r32 Isoleucine

t1 Asparagine

r31 Ornithine

r32 Leucine

t2 3-Methoxytyrosine

r21 5-Oxoproline

r32 Methionine

r31 Galactitol

r31 Histidine

r32 Phenylalanine

Cum Glutamic acid

r21 Histidine

r32 Tryptophan

Cum Cystine

r21 Ornithine

r32 2,3-Diaminopropioni

Cum Glutamine

r31 5-Oxoproline

r325-Oxoproline

Cum Asparagine

r31 Arginine

r32 Glutamic acid

t3 3-Methoxytyrosine

r21 Arginine

r32 Hippuric acid

t1 3-Methoxytyrosine

r31 Creatinine

r32 Sn-Glycero-3-phosph

r21 Gluconic acid

r21 Carnitine

r32 Proline

r21 Galactitol

r21 Creatinine

r32 Tyrosine

Cum 4-Hydroxyproline

t2 Caffeine

r32 Histidine

r31 Gluconic acid

t2 Paraxanthine

r32 Indoxyl sulfate

t2 Glutamic acid

Cum Paraxanthine

t3 Serine

t1 Ornithine

r31 Carnitine

t3 Glutamine

t1 4-Hydroxyproline

Cum Caffeine

t2 Sn-Glycero-3-phosphocho

t1 Cystine

t3 Caffeine

r32 Galactitol

t2 Cystine

t1 Paraxanthine

Cum Sn-Glycero-3-phosph

t1 Leucine

*Abbreviations: t1 – time point one, immediate pre-op; t2 – time point 2, immediate post-op; t3 – time point 3, 12 hours post op; r21 – ratio of t2 to t1; r31 – ratio of t3 to t1; r32 – ratio of t3 to t2; cum – cumulative values from t1, t2, t3.*

**Table S3. Association between principal components loads and outcomes**

| <b>Composite-<br/>mortality/morbidity</b> |                 |           |           |            |            |                |
|-------------------------------------------|-----------------|-----------|-----------|------------|------------|----------------|
| <b>Parameter</b>                          | <b>Estimate</b> | <b>SE</b> | <b>OR</b> | <b>LCL</b> | <b>UCL</b> | <b>p-value</b> |
| Site = 2                                  | 2.5713          | 0.5524    | 13.0828   | 4.4186     | 38.7359    | <.001          |
| PGE ever = 0                              | -2.3215         | 0.6667    | 0.0981    | 0.0265     | 0.3637     | 0.001          |
| STAT category                             | 0.7071          | 0.2868    | 2.0281    | 1.1544     | 3.5632     | 0.01           |
| Pre-surgery lactate                       | 0.8811          | 0.5812    | 2.4136    | 0.7703     | 7.5622     | 0.13           |
| Gestational age birth                     | -0.2656         | 0.209     | 0.7667    | 0.5085     | 1.1561     | 0.20           |
| PC1                                       | 0.194           | 0.0489    | 1.2141    | 1.1029     | 1.3365     | <.001          |
| <b>Composite - cardiac</b>                |                 |           |           |            |            |                |
| <b>Parameter</b>                          | <b>Estimate</b> | <b>SE</b> | <b>OR</b> | <b>LCL</b> | <b>UCL</b> | <b>p-value</b> |
| Site = 2                                  | 1.7387          | 0.5087    | 5.6899    | 2.0941     | 15.4606    | 0.001          |
| PGE ever = 0                              | -1.1979         | 0.6765    | 0.3018    | 0.0799     | 1.1404     | 0.08           |
| STAT category                             | 0.7343          | 0.3098    | 2.084     | 1.1338     | 3.8307     | 0.02           |
| Pre-surgery lactate                       | 1.3524          | 0.5839    | 3.8667    | 1.2276     | 12.1796    | 0.02           |
| Gestational age birth                     | -0.1182         | 0.2149    | 0.8885    | 0.5825     | 1.3554     | 0.58           |
| PC1                                       | 0.1429          | 0.0448    | 1.1536    | 1.0564     | 1.2598     | 0.001          |
| <b>Hepatic</b>                            |                 |           |           |            |            |                |
| <b>Parameter</b>                          | <b>Estimate</b> | <b>SE</b> | <b>OR</b> | <b>LCL</b> | <b>UCL</b> | <b>p-value</b> |
| Site = 2                                  | 1.7943          | 0.5538    | 6.0153    | 2.026      | 17.8592    | 0.001          |
| PGE ever = 0                              | -2.5462         | 0.6967    | 0.0784    | 0.0199     | 0.3081     | <.001          |
| STAT category                             | 0.9034          | 0.331     | 2.468     | 1.2879     | 4.7295     | 0.006          |
| Pre-surgery lactate                       | -0.0927         | 0.6245    | 0.9115    | 0.2672     | 3.1094     | 0.88           |
| Gestational age birth                     | -0.3044         | 0.2312    | 0.7376    | 0.4683     | 1.1617     | 0.19           |
| PC1                                       | 0.2454          | 0.0556    | 1.2781    | 1.1458     | 1.4257     | <.001          |
| <b>Lactate</b>                            |                 |           |           |            |            |                |

| Parameter             | Estimate | SE     | OR     | LCL    | UCL     | p-value |
|-----------------------|----------|--------|--------|--------|---------|---------|
| Site = 2              | 1.5581   | 0.5362 | 4.7498 | 1.6561 | 13.6226 | 0.004   |
| PGE ever = 0          | -1.2537  | 0.733  | 0.2854 | 0.0676 | 1.2052  | 0.09    |
| STAT category         | 1.0129   | 0.3706 | 2.7536 | 1.3293 | 5.7038  | 0.006   |
| Pre-surgery lactate   | 1.4959   | 0.6119 | 4.4634 | 1.3411 | 14.8542 | 0.01    |
| Gestational age birth | -0.1564  | 0.238  | 0.8552 | 0.5358 | 1.3652  | 0.51    |
| PC1                   | 0.124    | 0.045  | 1.132  | 1.0362 | 1.2367  | 0.006   |

### AKI

| Parameter             | Estimate | SE     | OR     | LCL    | UCL    | p-value |
|-----------------------|----------|--------|--------|--------|--------|---------|
| Site = 2              | -0.0911  | 0.4223 | 0.9129 | 0.3982 | 2.0933 | 0.83    |
| PGE ever = 0          | 0.3593   | 0.5544 | 1.4323 | 0.4819 | 4.2576 | 0.52    |
| RACHS class           | 0.2391   | 0.2391 | 1.2701 | 0.794  | 2.0318 | 0.32    |
| Pre-surgery lactate   | -0.4263  | 0.4719 | 0.6529 | 0.2583 | 1.6503 | 0.37    |
| Gestational age birth | 0.1899   | 0.1599 | 1.2091 | 0.8831 | 1.6555 | 0.24    |
| PC1                   | 0.0655   | 0.0289 | 1.0677 | 1.0087 | 1.1301 | 0.02    |
| PC3                   | 0.0799   | 0.0358 | 1.0832 | 1.0096 | 1.1621 | 0.03    |

Abbreviations: AIC - Akaike Information Criterion, Estimate – regression parameter estimate, LCL – lower 95% confidence limit, OR – odds ratio, PC - principal component, PGE – prostaglandins, REL – Reliability score, SE – standard error, UCL – upper 95% confidence limit

**Table S4. Final multivariable analysis between principal components loads, top metabolic hits and outcomes**

**Composite**

**morbidity/mortality**

| Parameter             | Rel    | Estimate | SE     | OR      | LCL    | UCL      | p-value |
|-----------------------|--------|----------|--------|---------|--------|----------|---------|
| Site = 2              | .      | 3.6594   | 0.9285 | 38.838  | 6.2645 | 240.7845 | <.001   |
| PGE ever = 0          | .      | -2.9055  | 1.0386 | 0.0547  | 0.0071 | 0.4212   | 0.005   |
| STAT category         | .      | 0.214    | 0.4158 | 1.2386  | 0.5471 | 2.804    | 0.61    |
| Pre-surgery lactate   | .      | 2.4624   | 0.9957 | 11.7329 | 1.6584 | 83.0091  | 0.01    |
| Gestational age birth | .      | -0.1315  | 0.3241 | 0.8768  | 0.4638 | 1.6576   | 0.68    |
| T3 Cystine            | 100.0% | -0.0664  | 0.0216 | 0.9358  | 0.8969 | 0.9763   | 0.002   |
| T3 4-Hydroxyproline   | 100.0% | 0.0799   | 0.0213 | 1.0832  | 1.0388 | 1.1295   | <.001   |
| T3 3-Methoxytyrosine  | 95.6%  | -3.7156  | 1.1672 | 0.0243  | 0.0025 | 0.2412   | 0.002   |
| r21 Homoserine        | 93.4%  | -1.3991  | 0.6561 | 0.2468  | 0.068  | 0.896    | 0.03    |
| t1 Ornithine          | 98.2%  | -0.0075  | 0.003  | 0.9925  | 0.9867 | 0.9984   | 0.01    |
| t1 Phenylalanine      | 75.0%  | 0.0032   | 0.0012 | 1.0032  | 1.0009 | 1.0055   | 0.007   |
| t1 Methionine         | 91.4%  | 0.0122   | 0.006  | 1.0123  | 1.0004 | 1.0243   | 0.04    |

**Composite - cardiac**

| Parameter             | Rel   | Estimate | SE     | OR     | LCL    | UCL     | p-value |
|-----------------------|-------|----------|--------|--------|--------|---------|---------|
| Site = 2              | .     | 2.1294   | 0.6018 | 8.4098 | 2.5776 | 27.4382 | <.001   |
| PGE ever = 0          | .     | -1.1273  | 0.7525 | 0.3239 | 0.0738 | 1.421   | 0.13    |
| STAT category         | .     | 0.7338   | 0.3276 | 2.083  | 1.0942 | 3.9651  | 0.03    |
| Pre-surgery lactate   | .     | 1.4609   | 0.6842 | 4.3098 | 1.1235 | 16.5329 | 0.03    |
| Gestational age birth | .     | -0.0094  | 0.252  | 0.9907 | 0.6038 | 1.6255  | 0.97    |
| Cum Proline           | 90.8% | 0.0014   | 0.0005 | 1.0014 | 1.0005 | 1.0023  | 0.003   |
| T3 Proline            | 73.0% | 0.0032   | 0.0013 | 1.0032 | 1.0006 | 1.0058  | 0.02    |
| T3 Leucine            | 62.0% | -0.0202  | 0.0075 | 0.98   | 0.9657 | 0.9945  | 0.007   |

### Hepatic

| Parameter             | Rel   | Estimate | SE     | OR     | LCL    | UCL     | p-value |
|-----------------------|-------|----------|--------|--------|--------|---------|---------|
| Site = 2              | .     | 1.1931   | 0.6519 | 3.2973 | 0.9159 | 11.8708 | 0.07    |
| PGE ever = 0          | .     | -2.898   | 0.8879 | 0.0551 | 0.0096 | 0.3156  | 0.001   |
| STAT category         | .     | 1.3183   | 0.444  | 3.7371 | 1.5618 | 8.942   | 0.003   |
| Pre-surgery lactate   | .     | 0.5358   | 0.7452 | 1.7088 | 0.3951 | 7.3899  | 0.47    |
| Gestational age birth | .     | -0.5332  | 0.3063 | 0.5867 | 0.3214 | 1.0711  | 0.08    |
| t1 Carnitine          | 76.2% | 0.0104   | 0.0025 | 1.0105 | 1.0054 | 1.0155  | <.001   |
| T3 Tyrosine           | 99.0% | 0.0058   | 0.0018 | 1.0058 | 1.0022 | 1.0095  | 0.002   |
| t1 Aspartic acid      | 93.2% | 0.1012   | 0.0462 | 1.1065 | 1.0105 | 1.2116  | 0.03    |
| r21 Caffeine          | 99.6% | -0.2577  | 0.107  | 0.7728 | 0.6263 | 0.9537  | 0.02    |

### Lactate

| Parameter             | Rel   | Estimate | SE     | OR     | LCL    | UCL     | p-value |
|-----------------------|-------|----------|--------|--------|--------|---------|---------|
| Site = 2              | .     | 0.6703   | 0.7341 | 1.9548 | 0.462  | 8.2714  | 0.36    |
| PGE ever = 0          | .     | -0.8979  | 0.9172 | 0.4074 | 0.0672 | 2.4704  | 0.33    |
| STAT category         | .     | 0.9303   | 0.3016 | 2.5353 | 1.4017 | 4.5857  | 0.002   |
| Pre-surgery lactate   | .     | 1.3468   | 0.8898 | 3.8451 | 0.6692 | 22.0929 | 0.13    |
| Gestational age birth | .     | -0.2032  | 0.3036 | 0.8161 | 0.4494 | 1.482   | 0.50    |
| R31 Galactitol        | 98.2% | 0.0056   | 0.0021 | 1.0056 | 1.0016 | 1.0097  | 0.007   |
| T3 Proline            | 98.8% | 0.005    | 0.0016 | 1.005  | 1.0019 | 1.008   | 0.001   |
| t1 Methionine         | 98.4% | 0.007    | 0.0028 | 1.0071 | 1.0015 | 1.0126  | 0.01    |
| T3 Leucine            | 74.6% | -0.0201  | 0.0086 | 0.9801 | 0.9637 | 0.9968  | 0.02    |

### AKI

| Parameter    | Rel | Estimate | SE     | OR     | LCL    | UCL    | p-value |
|--------------|-----|----------|--------|--------|--------|--------|---------|
| Site = 2     | .   | -0.3546  | 0.4885 | 0.7015 | 0.2686 | 1.8318 | 0.47    |
| PGE ever = 0 | .   | 0.3374   | 0.6385 | 1.4013 | 0.3996 | 4.9138 | 0.60    |

|                       |       |         |        |        |        |        |       |
|-----------------------|-------|---------|--------|--------|--------|--------|-------|
| STAT category         | .     | 0.1128  | 0.1818 | 1.1194 | 0.7831 | 1.6001 | 0.54  |
| Pre-surgery lactate   | .     | -0.1401 | 0.5091 | 0.8693 | 0.3197 | 2.3638 | 0.78  |
| Gestational age birth | .     | 0.2503  | 0.1766 | 1.2844 | 0.9078 | 1.8172 | 0.16  |
| T3 Alanine            | 69.2% | 0.0809  | 0.0439 | 1.0843 | 0.9947 | 1.1819 | 0.07  |
| T3 Glutamic acid      | 76.4% | 0.0086  | 0.0037 | 1.0087 | 1.0013 | 1.016  | 0.02  |
| T3 4-Hydroxyproline   | 70.4% | 0.0238  | 0.0093 | 1.0241 | 1.0055 | 1.043  | 0.01  |
| T3 Serine             | 72.6% | -0.022  | 0.0082 | 0.9782 | 0.9627 | 0.9941 | 0.007 |
| t1 Ornithine          | 80.6% | 0.0024  | 0.0009 | 1.0024 | 1.0005 | 1.0042 | 0.01  |

*Abbreviations: AIC - Akaike Information Criterion, Estimate – regression parameter estimate, LCL – lower 95% confidence limit, OR – odds ratio, PC - principal component, PGE – prostaglandins, REL – Reliability score, SE – standard error, UCL – upper 95% confidence limit*
